# Supplementary material
Source: PubMed Central journal article supplement (PMC534541)

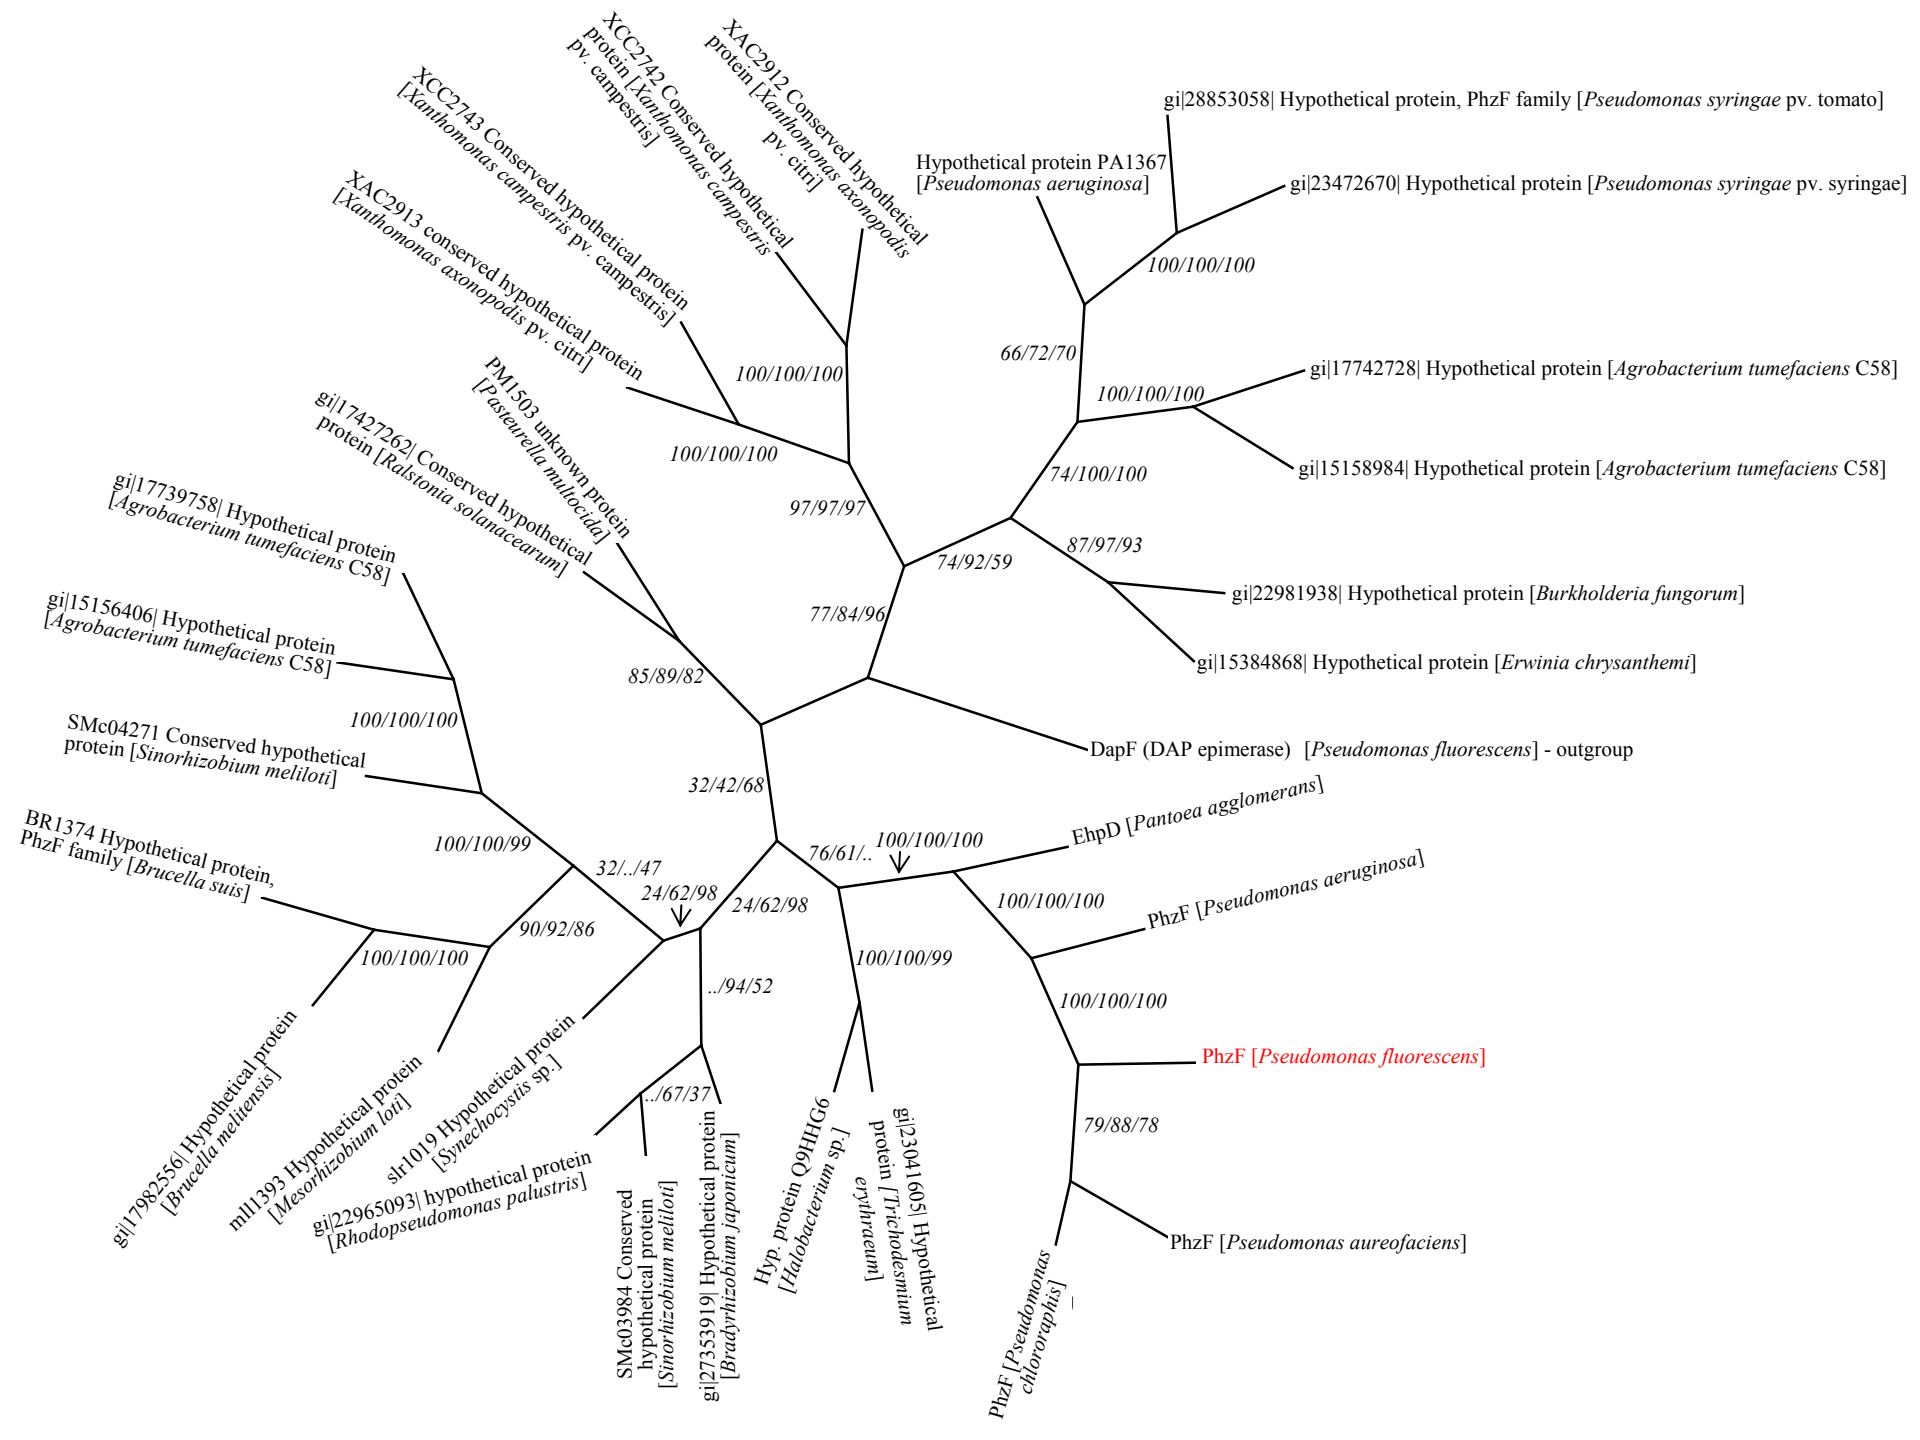

Supplement: pnas_101_47_16431__10.pdf [file pnas_101_47_16431__10.pdf]

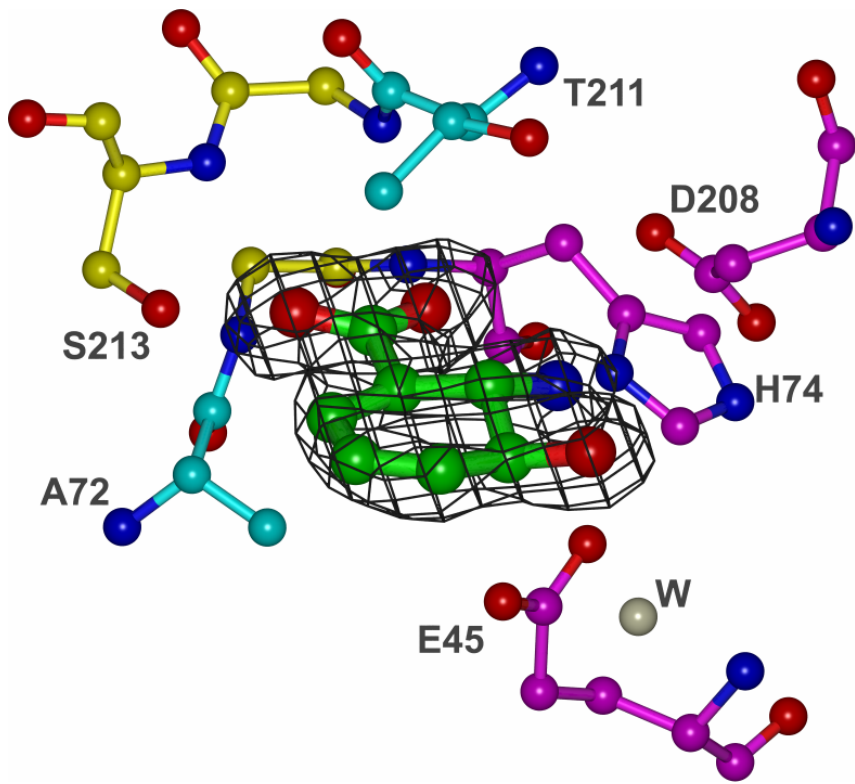

Supplement: pnas_101_47_16431__3.pdf [file pnas_101_47_16431__3.pdf]

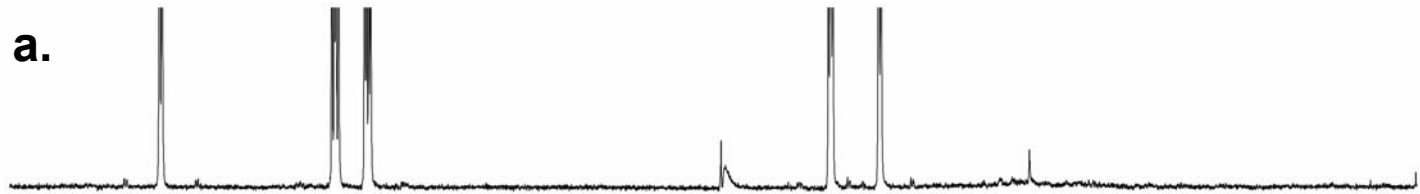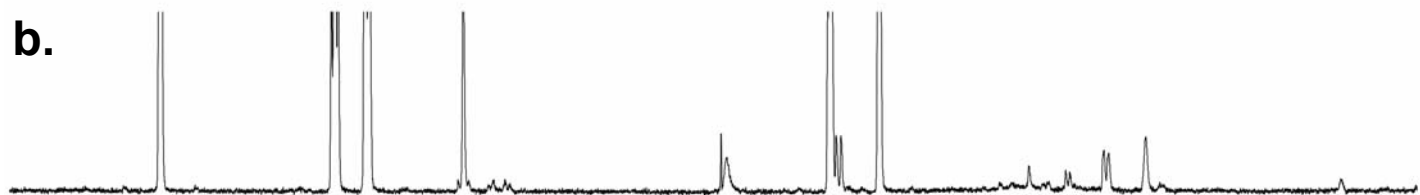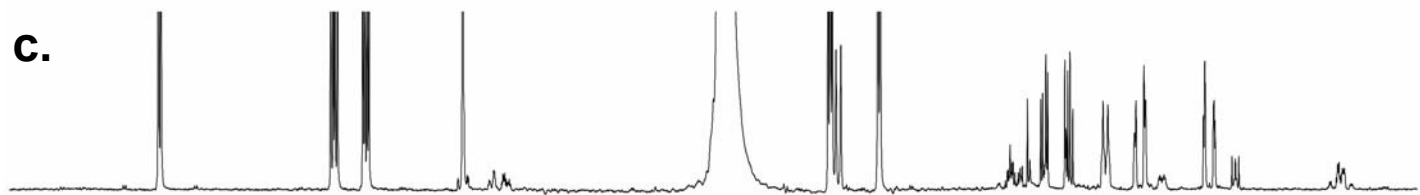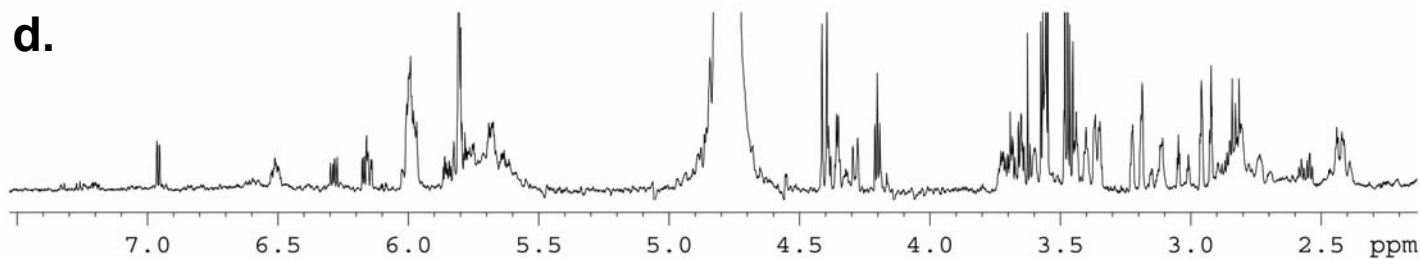

7.0 6.5 6.0 5.5 5.0 4.5 4.0 3.5 3.0 2.5 ppm

Supplement: pnas_101_47_16431__5.pdf [file pnas_101_47_16431__5.pdf]

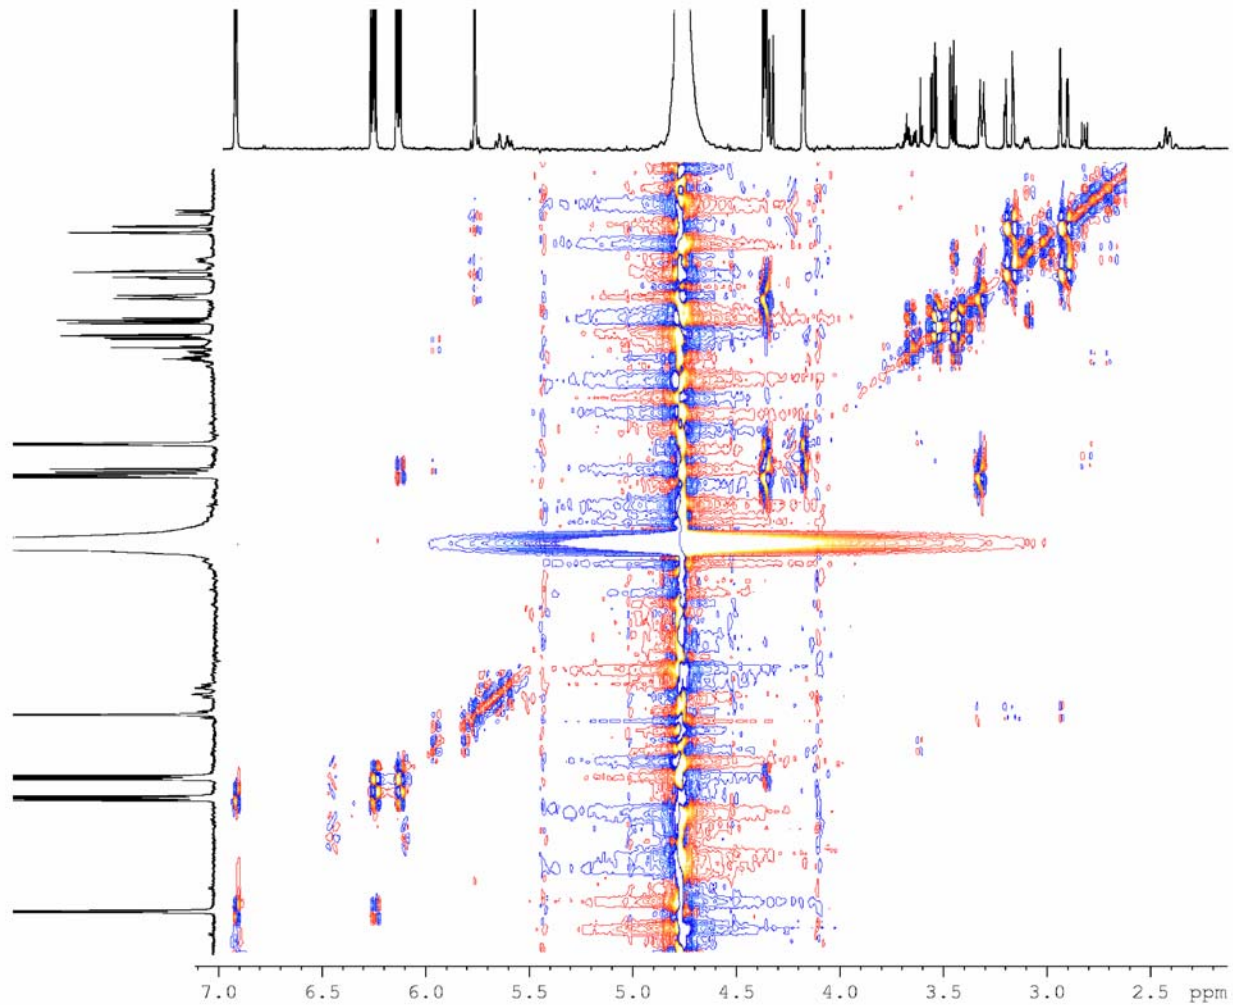

Supplement: pnas_101_47_16431__6.pdf [file pnas_101_47_16431__6.pdf]

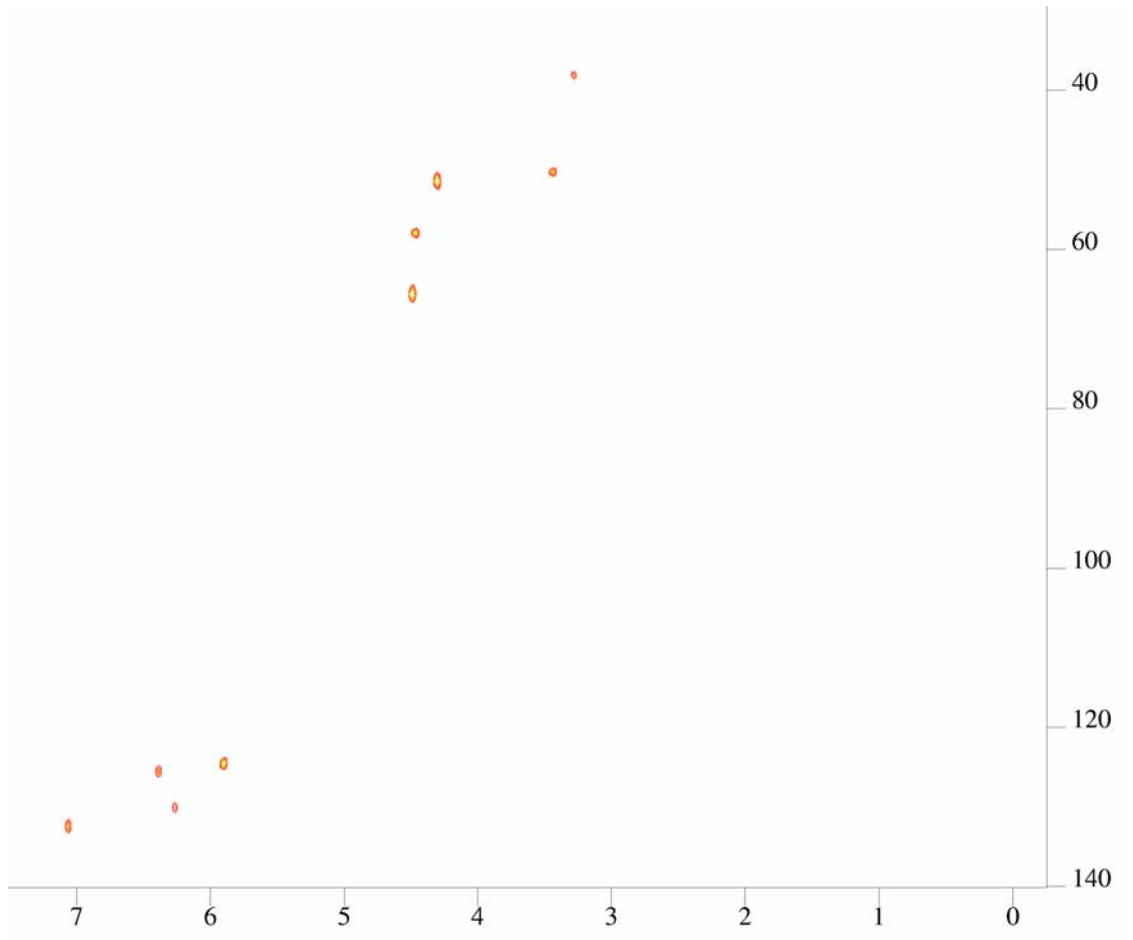

Supplement: pnas_101_47_16431__7.pdf [file pnas_101_47_16431__7.pdf]

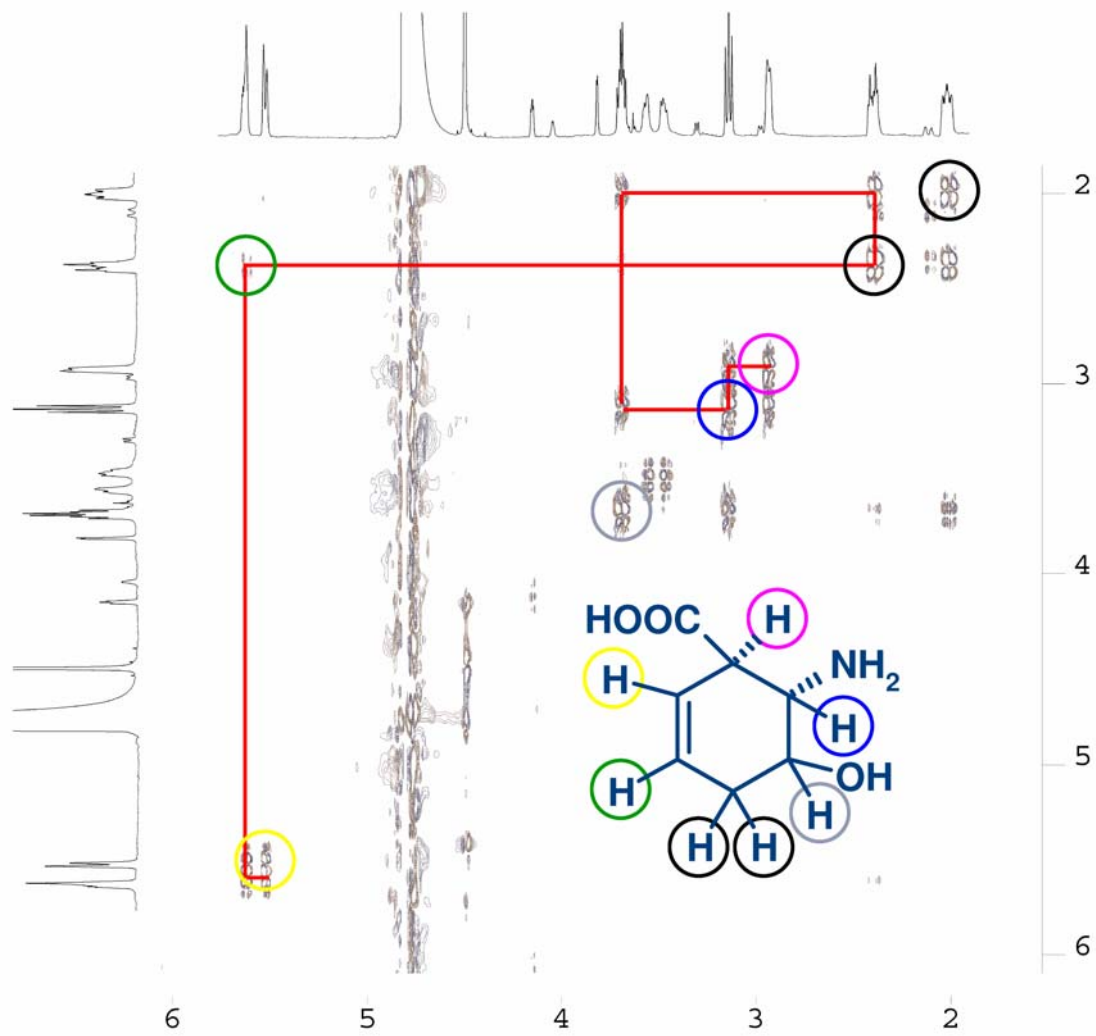

Supplement: pnas_101_47_16431__8.pdf [file pnas_101_47_16431__8.pdf]

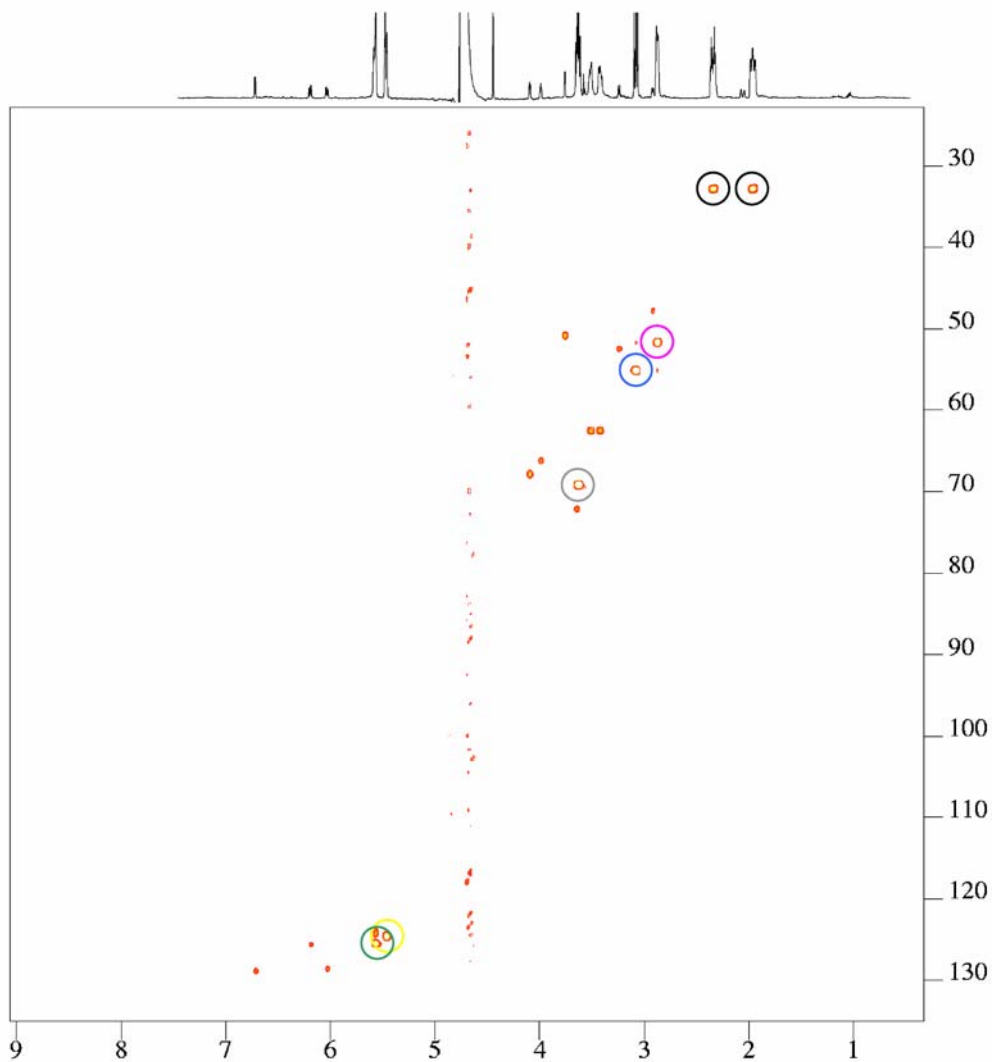

Supplement: pnas_101_47_16431__9.pdf [file pnas_101_47_16431__9.pdf]
